# Supplementary material
Source: publisher figshare collection journal article supplement (https://acs.figshare.com/ndownloader/files/3804208)
Supplement: Supplementary file 1 [file 3804208]

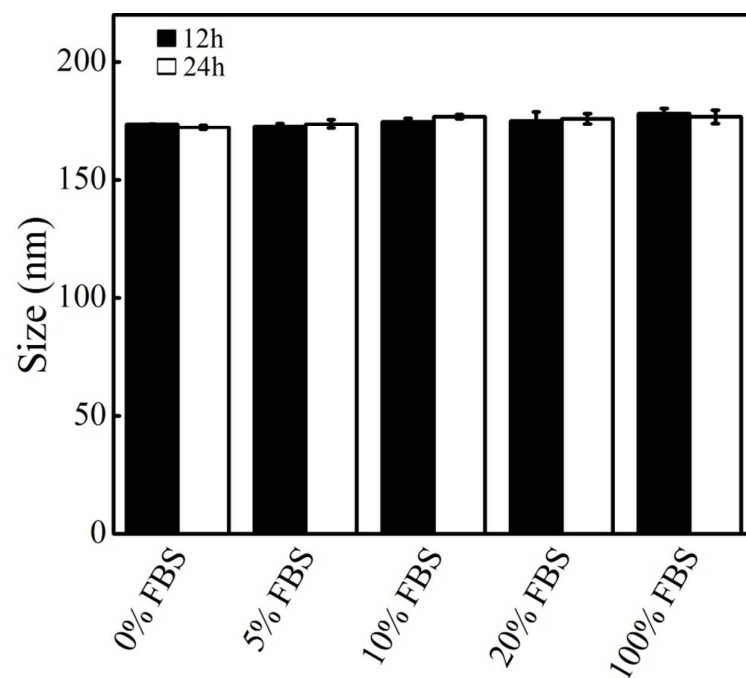

**Supplementary Figure 1.** The size of P(OEGMAss-AA) nanogels in PBS containing different concentrations of FBS. Data as mean value $\pm$ SD (n = 3).
